# Supplementary material for: Chrysanthemum ethanol extract induced loss of Kupffer cellsviathe mitochondria-dependent apoptotic pathway
Source: Royal Society of Chemistry journal article supplement (doi:10.1039/d0fo00695e), 2020-01-01
Supplement: d0fo00695e1.pdf [file d0fo00695e1.pdf]

### **A list of Supporting Information:**

**Figure S1.** Flow cytometry indicated that CEE induced apoptosis of RAW264.7 cells in a dose-dependent manner.

**Figure S2.** Flow cytometry indicated that CEE-PE induced apoptosis of RAW264.7 cells in a dose-dependent manner.

**Figure S3.** Flow cytometry indicated that 66 µg/mL CEE-DCM could not induce apoptosis of RAW264.7 cells.

**Figure S4.** Toxic compounds from CEE-PE didn't cause severe damage to L02 cells, a type of normal hepatocyte cell line.

**Table S1.** Serum biochemistry test revealed that CEE-PE was not directly harmful to the liver of mice.
